# Supplementary material for: Activating Partnership Assets to Produce Synergy in Primary Health Care: A Mixed Methods Study
Source: Healthcare (Basel). 2021 Aug 18;9(8):1060. doi: 10.3390/healthcare9081060 (PMC8394800; doi:10.3390/healthcare9081060)
Supplement: Supplementary file 1 [file healthcare-09-01060-s001.zip › healthcare-1285420-supplementary.pdf]

**Table S1. Mapping of qualitative categories onto the PSAT scales.**

| <b>Qualitative Categories</b>                  | <b>Existing PSAT (2002 version) scales</b>                       | <b>New scales and items</b>                                                               | <b>Item content</b>                                                                                                                                                                                                                                                                                                                                                                                                                                                                                                                                                                                                                                                                                                                                                                                                                                                                                                                                                                                                      |
|------------------------------------------------|------------------------------------------------------------------|-------------------------------------------------------------------------------------------|--------------------------------------------------------------------------------------------------------------------------------------------------------------------------------------------------------------------------------------------------------------------------------------------------------------------------------------------------------------------------------------------------------------------------------------------------------------------------------------------------------------------------------------------------------------------------------------------------------------------------------------------------------------------------------------------------------------------------------------------------------------------------------------------------------------------------------------------------------------------------------------------------------------------------------------------------------------------------------------------------------------------------|
| <b>1) Non-financial</b><br>(intangible) assets | <b>Non-financial resources</b><br>(6 items)                      | New descriptive questions about organizational expertise brought to the partnership table | Assessment of the degree to which the following resources were present: skills and expertise; data and information; connections to target populations; connections to political decision-makers, government agencies, other organizations/groups; legitimacy and credibility; convening power                                                                                                                                                                                                                                                                                                                                                                                                                                                                                                                                                                                                                                                                                                                            |
| <b>2) Financial</b><br>(tangible) assets       | <b>Financial and other capital resources</b> (3 items)           |                                                                                           | Assessment of the degree to which the following resources were present: financial support; space; equipment and goods                                                                                                                                                                                                                                                                                                                                                                                                                                                                                                                                                                                                                                                                                                                                                                                                                                                                                                    |
| <b>3) Resource integration</b>                 | <b>Efficiency</b> (3 items), renamed <b>Resource Utilization</b> | New descriptive questions about the nature of stakeholder engagement                      | Assessment of how well the partnership used partner's time, other non-financial resources, and financial resources                                                                                                                                                                                                                                                                                                                                                                                                                                                                                                                                                                                                                                                                                                                                                                                                                                                                                                       |
| <b>4) Leadership</b>                           | <b>Leadership</b> (11 items)                                     |                                                                                           | Assessment of the partnership's leadership in the following areas:<br><ul style="list-style-type: none"> <li>- Taking responsibility for the partnership;</li> <li>- Communicating the vision of the partnership;</li> <li>- Working to develop a common language within the partnership;</li> <li>- Building on the perspectives, resources and skills of partners;</li> <li>- Helping the partnership to look at things differently;</li> <li>- Fostering respect, trust, inclusiveness and openness in the partnership;</li> <li>- Creating an environment where differences of opinion can be voiced;</li> <li>- Inspiring or motivating people involved in the partnership;</li> <li>- Empowering people involved in the partnership;</li> <li>- Resolving conflict among partners;</li> <li>- Recruiting diverse people and organizations into the partnership</li> </ul>                                                                                                                                          |
| <b>5) Administration and management</b>        | <b>Administration and management</b> (9 items)                   |                                                                                           | Assessment of the administration/management's performance in each of the following areas:<br><ul style="list-style-type: none"> <li>- Coordinating communication among partners;</li> <li>- Coordinating communication with people and organizations outside the partnership;</li> <li>- Informing partners on how their input is being integrated;</li> <li>- Organizing the overall work of the partnership;</li> <li>- Performing secretarial duties;</li> <li>- Preparing materials that inform partners and help them make timely decisions;</li> <li>- Providing orientation to new partners as they join the partnership;</li> <li>- Minimizing barriers to participation in meetings and activities (e.g., meetings at convenient places and times, providing transportation, etc.);</li> <li>- Facilitating meetings;</li> <li>- Accurately reflecting discussions and decisions in the minutes of meetings or other documentation;</li> <li>- Evaluating the progress and impact of the partnership</li> </ul> |
| <b>6) Communication</b>                        |                                                                  | New scale for <b>Communication</b> (3 items)                                              | How the participants learn about what is happening in the partnership; how useful the information is; do the participants receive enough information                                                                                                                                                                                                                                                                                                                                                                                                                                                                                                                                                                                                                                                                                                                                                                                                                                                                     |

|                                 |                                                                                                |                                                               |                                                                                                                                                                                                                                                                                                                                                                                                                                                                                                                                                                                                                                                                                                                                                                                                                                                                                                                                                                                                                                                                                                                                                                                                                                                                                                                                                                                                                                                                                                                               |
|---------------------------------|------------------------------------------------------------------------------------------------|---------------------------------------------------------------|-------------------------------------------------------------------------------------------------------------------------------------------------------------------------------------------------------------------------------------------------------------------------------------------------------------------------------------------------------------------------------------------------------------------------------------------------------------------------------------------------------------------------------------------------------------------------------------------------------------------------------------------------------------------------------------------------------------------------------------------------------------------------------------------------------------------------------------------------------------------------------------------------------------------------------------------------------------------------------------------------------------------------------------------------------------------------------------------------------------------------------------------------------------------------------------------------------------------------------------------------------------------------------------------------------------------------------------------------------------------------------------------------------------------------------------------------------------------------------------------------------------------------------|
| <b>7) Decision-making</b>       | <b>Decision-making</b> (3 items)                                                               |                                                               | The top ways in which decisions are made; how comfortable participants are with the way decisions are made; how often participants feel included in the decision-making process; how well the partnership addresses problems.                                                                                                                                                                                                                                                                                                                                                                                                                                                                                                                                                                                                                                                                                                                                                                                                                                                                                                                                                                                                                                                                                                                                                                                                                                                                                                 |
| <b>8) Contextual adaptation</b> |                                                                                                | New scale for <b>External environment</b> (2 items)           | Assessment of the extent to which the partnership has been affected by external factors, beyond the control of the partnership; how well the partnership has adapted to these external influences                                                                                                                                                                                                                                                                                                                                                                                                                                                                                                                                                                                                                                                                                                                                                                                                                                                                                                                                                                                                                                                                                                                                                                                                                                                                                                                             |
| <b>9) Reported benefits</b>     | <b>Benefits of participation</b> (11 items)<br><br><b>Drawbacks of participation</b> (6 items) |                                                               | <p>Whether the organization that each stakeholder is representing has benefitted from:</p> <ul style="list-style-type: none"> <li>- Enhanced ability to address an important issue;</li> <li>- Development of new skills;</li> <li>- Heightened public profile of the organization;</li> <li>- Increased understanding of partners of my organization's expertise and services;</li> <li>- Acquisition of useful knowledge about services, programs or people represented in the partnership;</li> <li>- Enhanced ability to affect public policy;</li> <li>- Development of valuable relationships;</li> <li>- Enhanced ability to meet the needs of my organization's constituency or clients;</li> <li>- Ability to have a greater impact than we could have on our own;</li> <li>- Ability to make a contribution to the community;</li> <li>- Acquisition of additional financial support</li> </ul> <p>Whether the organization that each stakeholder is representing has experienced the following:</p> <ul style="list-style-type: none"> <li>- Diversion of time and resources away from other priorities or obligations;</li> <li>- Insufficient influence in partnership activities;</li> <li>- Negative publicity due to association with other partners or the partnership;</li> <li>- Insufficient credit given to my organization for contributing to the accomplishments of the partnership;</li> <li>- Conflict between the demands of this partnership and other projects within my organization</li> </ul> |
| <b>10) Partnership synergy</b>  | Weiss <i>et al.</i> scale [49] – 2 items retained                                              | Jones synergy scale (Jones & Barry, 2011b) – 5 items retained | How well the partners are able to: identify new and creative ways to solve problems; include the views and priorities of the people affected by the partnership's work. How often the participants feel that the partnership is making good progress towards its goals; added value is achieved as a result of working in this partnership; the skills and unique perspectives of the partners complement each other; all partners are benefiting from the activities of the partnership; how often does the partnership experience feelings of energy, excitement and passion                                                                                                                                                                                                                                                                                                                                                                                                                                                                                                                                                                                                                                                                                                                                                                                                                                                                                                                                                |
